# Supplementary material
Source: publisher figshare collection journal article supplement (https://future-science-group.figshare.com/ndownloader/files/31547504)
Supplement: Supplementary file 1 [file 31547504]

Supplementary Table 3. Individual CPB and cardioplegia times
